# Supplementary material for: N-heterocyclic carbene stabilized copper- and silver-phenylchalcogenolate ring complexes
Source: Royal Society of Chemistry journal article supplement (doi:10.1039/c2dt11998f), 2012-01-01
Supplement: c2dt11998f.pdf [file c2dt11998f.pdf]

## **SUPPLEMENTARY INFORMATION**

N-Heterocyclic Carbene Stabilized Copper- and Silver-Phenylchalcogenolate Ring Complexes

**William Hummeny<sup>a,‡</sup>, Stefan Mitzinger<sup>a,‡</sup>, Chhatra B. Khadka<sup>a</sup>, Bahareh Khalili Najafabadi<sup>a</sup> Isabelle Vieira<sup>a</sup> and John F. Corrigan<sup>a,b,\*</sup>**

<sup>a</sup> Department of Chemistry, *The University of Western Ontario*, London, Ontario, N6A 5B7 CANADA

<sup>b</sup> Centre for Advanced Materials and Biomaterials Research, *The University of Western Ontario*, London, Ontario, N6A 3K7 CANADA

<sup>‡</sup> These co-authors contributed equally to this work.

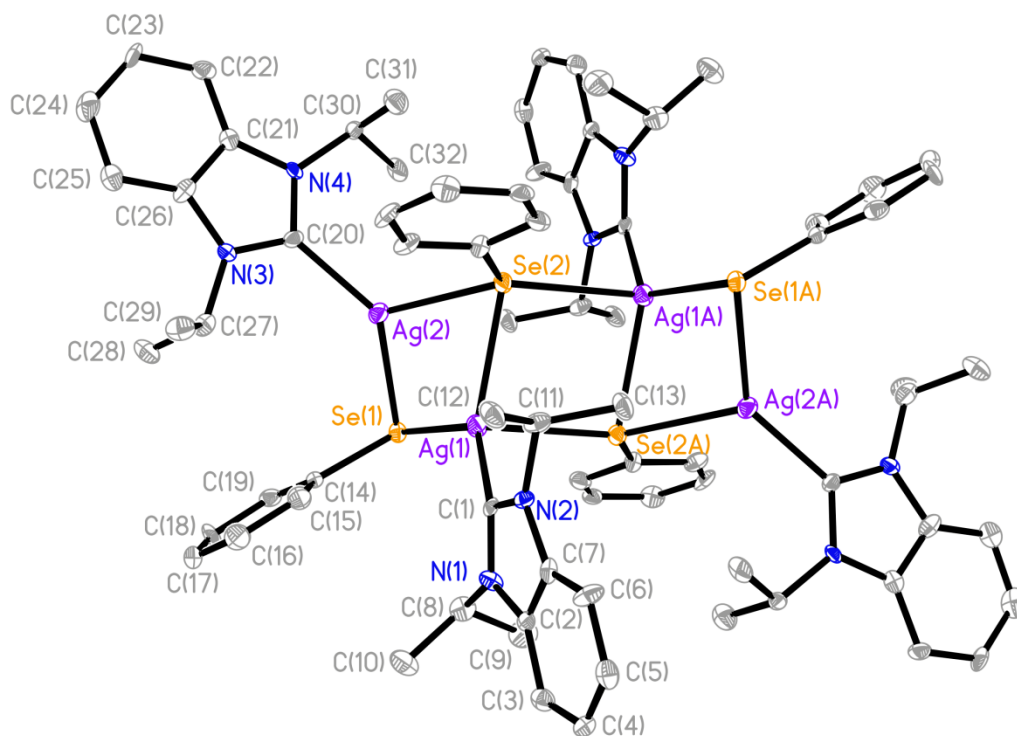

---

**Figure S1.** The molecular structure and atomic numbering for **6**. Thermal ellipsoids are drawn at the 40 % probability level. Hydrogen atoms omitted for clarity.

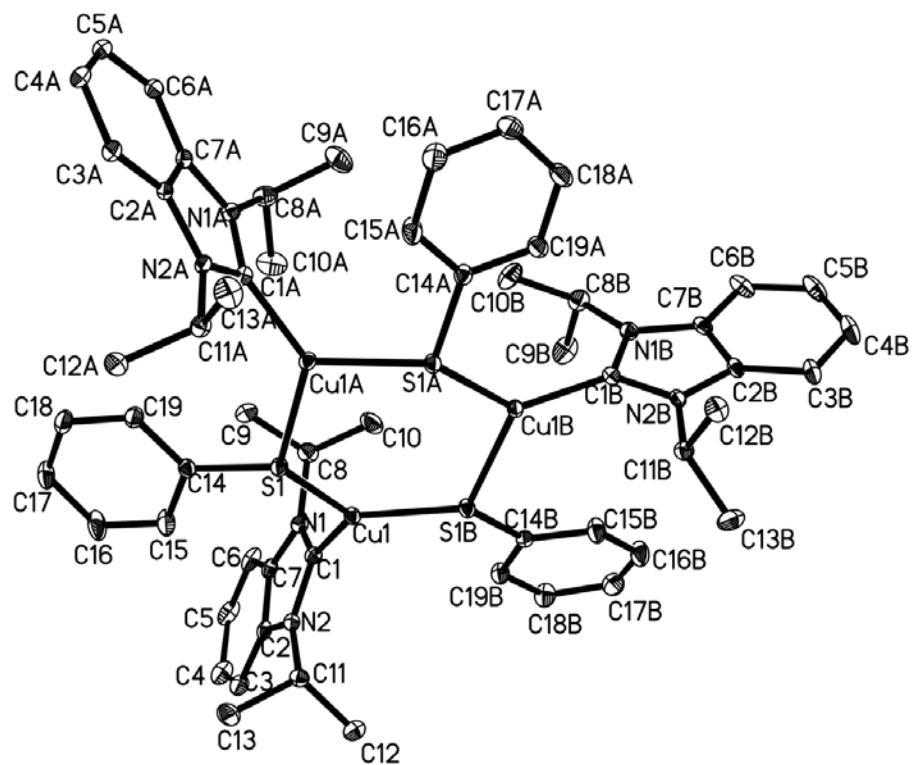

**Figure S2.** The molecular structure and atomic numbering for **7**. Thermal ellipsoids are drawn at the 40 % probability level. Hydrogen atoms omitted for clarity.
